# Supplementary material for: Intrinsic risk factors for alpha-gal syndrome in a case-control study, 2019 to 2020
Source: PubMed Central journal article supplement — Ann Allergy Asthma Immunol. Author manuscript; Available in PMC 2024 Aug 12. (PMC11318600; doi:10.1016/j.anai.2024.01.029), 2024-02-08
Supplement: NIHMS2000127-supplement-1.pdf [file NIHMS2000127-supplement-1.pdf]

## Supplementary Data

**eTable 1**  
Number of Case and Control Patients, by Medical History and Dietary History

| Medical History and Dietary History                                                                                                                      | Case patients, n (%) | Control patients, n (%) | OR <sup>c</sup> | LCL  | UCL  |
|----------------------------------------------------------------------------------------------------------------------------------------------------------|----------------------|-------------------------|-----------------|------|------|
| <b>Medical history:</b>                                                                                                                                  |                      |                         |                 |      |      |
| Have you ever been told by a doctor, nurse, or other health professional that you have the following?                                                    |                      |                         |                 |      |      |
| Diabetes, type 1                                                                                                                                         | 2 (2)                | 0                       | —               | —    | —    |
| Stroke                                                                                                                                                   | 0                    | 3 (2)                   | —               | —    | —    |
| Celiac disease                                                                                                                                           | 1 (1)                | 0                       | —               | —    | —    |
| Have you ever required a heart valve transplant from a cow or pig?                                                                                       | 0                    | 1 (1)                   | —               | —    | —    |
| Are you currently taking any medication or treatment that affects your body's ability to fight infection or suppresses your immune system <sup>a</sup> ? | 3 (4)                | 6 (3)                   | 1.26            | 0.31 | 4.41 |
| <b>Dietary history:</b>                                                                                                                                  |                      |                         |                 |      |      |
| Are there foods that you avoid eating because of the way they make you feel?                                                                             | 29 (35)              | 50 (26)                 | 1.56            | 0.9  | 2.72 |
| Do you take probiotics (eg, Lactobacillus) regularly <sup>b</sup> ?                                                                                      | 16 (20)              | 24 (13)                 | 1.72            | 0.86 | 3.41 |
| Do you take any additional supplements?                                                                                                                  | 42 (51)              | 97 (51)                 | 1.03            | 0.61 | 1.74 |

Abbreviations: LCL, lower 95% confidence limit; OR, odds ratio; UCL, upper 95% confidence limit.

<sup>a</sup>Chemotherapy, biologics, long-term steroids.<sup>b</sup>>3 times per week.<sup>c</sup>ORs suppressed if less than or equal to 5 total patients.**eTable 2**  
Alpha-Gal Case Patient Reactions, by Organ System

| Reactions                               | Case patients, n (%) |
|-----------------------------------------|----------------------|
| <b>Mucocutaneous</b>                    | 75 (92)              |
| Hives                                   | 59 (72)              |
| Itching/redness of palms/soles of feet  | 56 (68)              |
| Throat swelling                         | 38 (46)              |
| Rash                                    | 38 (46)              |
| Lip swelling                            | 36 (44)              |
| Itching, watering, or red eyes          | 32 (39)              |
| Hoarse voice                            | 29 (35)              |
| Tongue swelling                         | 29 (35)              |
| <b>Gastrointestinal</b>                 | 75 (92)              |
| Abdominal pain/cramping                 | 61 (74)              |
| Diarrhea                                | 57 (70)              |
| Heartburn/indigestion                   | 51 (62)              |
| Nausea/vomiting                         | 40 (49)              |
| Difficulty swallowing                   | 36 (44)              |
| <b>Cardiovascular</b>                   | 67 (82)              |
| Palpitations (racing heart/extra beats) | 47 (57)              |
| Weakness/dizziness                      | 46 (56)              |
| Low blood pressure                      | 31 (38)              |
| Fainting/passing out                    | 18 (22)              |
| <b>Respiratory</b>                      | 46 (56)              |
| Difficulty breathing                    | 38 (46)              |
| Wheezing                                | 27 (33)              |
| <b>Neurologic</b>                       | 33 (40)              |
| Headache                                | 33 (40)              |

**eTable 3**  
Alpha-Gal Case Patient Reactions, Exacerbating Factors

| Exacerbating Factors                                                                                           | Yes, n | No or not sure, n | Not applicable, n | Percentage reacting of exposed (%) |
|----------------------------------------------------------------------------------------------------------------|--------|-------------------|-------------------|------------------------------------|
| Have you noticed whether drinking alcohol in the 2 hours before or after eating meat makes the reaction worse? | 17     | 41                | 23                | 29                                 |
| Have you noticed whether exercising in the 2 hours before or after eating meat makes the reaction worse?       | 24     | 51                | 7                 | 32                                 |

**eTable 4**  
Alpha-Gal Case Patient Reaction Triggers

| Have you had symptoms of alpha-gal allergy when you eat the following?                                                                   |        |       |              |                                    |
|------------------------------------------------------------------------------------------------------------------------------------------|--------|-------|--------------|------------------------------------|
| Reaction Triggers                                                                                                                        | Yes, n | No, n | Never eat, n | Percentage reacting of exposed (%) |
| Beef products (beef steaks, roasts, whole cuts of beef, hamburgers, and ground beef)                                                     | 76     | 2     | 4            | 97                                 |
| Pork products (whole pig, chops, tenderloin, roasts, shoulder, and ground pork)                                                          | 57     | 9     | 16           | 86                                 |
| Lamb                                                                                                                                     | 10     | 8     | 64           | 56                                 |
| Goat                                                                                                                                     | 2      | 5     | 75           | 29                                 |
| Processed meat products (sausage, bacon, kielbasa, bratwurst, hot dog, corn dog, pepperoni, jerky, deli meats/cold cuts, spam, and pate) | 51     | 8     | 23           | 86                                 |
| Wild game (bison, venison, etc.)                                                                                                         | 9      | 12    | 61           | 43                                 |
| Organ meat (tripe, scrapple, and sweetbread)                                                                                             | 7      | 0     | 75           | 100                                |
| Dairy (cheese and milk)                                                                                                                  | 48     | 31    | 3            | 61                                 |
| Marshmallows, Jell-O/gelatin, and gummies                                                                                                | 20     | 29    | 32           | 40                                 |
| Gel caps                                                                                                                                 | 19     | 42    | 21           | 31                                 |

**eTable 5**  
Alpha-Gal Case Patient Vaccine Administration and Reactions

| In the past 5 y, have you been vaccinated for: |           | If yes, did you have an allergic reaction <sup>a</sup> after getting this vaccine? |
|------------------------------------------------|-----------|------------------------------------------------------------------------------------|
| Doses administered                             |           | Allergic reactions                                                                 |
| MMR                                            | 4         | 0                                                                                  |
| Rabies                                         | 1         | 0                                                                                  |
| Shingles (Zostavax)                            | 15        | 1                                                                                  |
| Chicken pox (Varicella)                        | 0         | 0                                                                                  |
| Yellow fever                                   | 1         | 0                                                                                  |
| <b>Total</b>                                   | <b>21</b> | <b>1</b>                                                                           |

Abbreviations: MMR, measles/mumps/rubella.

<sup>a</sup>Hives, lips, tongue or throat swelling, low blood pressure, anaphylaxis.
